# Supplementary material
Source: MDPI journal article supplement (https://www.mdpi.com/2411-5134/8/6/153)
Supplement: s1 [file s1 › Table S1.xlsx]

## Sheet: Table S1A
	Genus	: precise detection on one version of SpiderID_APP
	nan	: no detection
	*	: low confidence detection (<50%)
		SpiderID_APP score	iNaturalist score	SpiderID_APP					iNaturalist		Note
				v7_WG			v7_NG			Scientific name
	Total	59	57	Genus	Gender	Conf	Genus	Conf
	1	2	2	Cyclosa	F	90.53	Cyclosa	94.43	Cyclosa	Cyclosa ginnaga
	2	2	2	Cyrtarachne	F	83.4	Cyrtarachne	90.77	Cyrtarachne	Cyrtarachne akirai
	3	2	2	Epocilla	M	92.04	Epocilla	95.41	Epocilla	Epocilla blairei
	4	2	2	Ebrechtella	F	79.1	Ebrechtella	73.34	Ebrechtella	Ebrechtella pseudovatia
	5	2	1	Chikunia	F	92.43	Chikunia	93.65	Theridiidae	Chikunia nigra
	6	2	2	Gasteracantha	F	88.23	Gasteracantha	92.87	Gasteracantha	Gasteracantha kuhli
	7	2	2	Telamonia	F	85.84	Telamonia	93.16	Telamonia	Telamonia festiva
	8	0	0	Leucauge	F	76.42	Leucauge	78.42	Leucauge	Telamonia festiva
	9	2	2	Smeringopus	F	91.8	Smeringopus	94.04	Smeringopus	Smeringopus
	10	2	1	Pardosa	F	71.97	Pardosa	94.48	Lycosoidea	Pardosa pseudoannulata
	11	0	1	Evarcha	F	69.38	Evarcha	90.62	Salticinae	Thiania
	12	1	0	Xysticus	F	35.21	Diaea	71.14	nan	Xysticus chui
	13	0	0	Eriovixia	F	23.03	Uloborus	18.96	nan	Poltys columnaris
	14	2	2	Gasteracantha	F	87.65	Gasteracantha	93.9	Gasteracantha	Gasteracantha sauteri
	15	2	2	Epeus	F	91.75	Epeus	95.95	Epeus	Epeus glorius
	16	1	2	Heteropoda	F	64.21	Heteropoda	70.46	Heteropoda	Heteropoda
	17	2	2	Ptocasius	F	90.48	Ptocasius	94.92	Ptocasius	Ptocasius strupifer
	18	2	2	Thomisus	F	82.62	Thomisus	91.94	Thomisus	Thomisus okinawensis
	19	2	2	Gea	F	78.56	Gea	83.69	Cyrtophora	Cyrtophora moluccensis
	20	2	2	Cyrtophora	F	92.58	Cyrtophora	93.41	Cyrtophora	Cyrtophora moluccensis
	21	2	1	Dolomedes	F	80.96	Dolomedes	95.46	Lycosoidea	Dolomedes raptor
	22	2	0	Tetragnatha	F	74.02	Tetragnatha	82.81	nan	Tetragnatha javana
	23	0	0	Hypsosinga	F	62.01	Hypsosinga	86.47	nan	Cyrtarachne yunoharuensis
	24	2	2	Thiania	M	89.7	Thiania	94.29	Thiania	Thiania subopressa
	25	0	0	Olios	F	86.96	Olios	94.09	nan	Argiope chloreis
	26	1	0	Plexippus	F	22.83	Ocrisiona	76.46	Kelawakaju	Ocrisiona frenata
	27	2	2	Rhomphaea	F	90.58	Rhomphaea	93.16	Rhomphaea	Rhomphaea
	28	2	1	Evarcha	F	81.84	Evarcha	88.09	Salticinae	Evarcha flavocincta
	29	2	1	Neoscona	M	88.48	Neoscona	94.87	Araneinae	Neoscona punctigera
	30	2	0	Agelena	F	80.52	Agelena	66.16	nan	Agelenidae
	31	2	2	Chrysso	F	86.38	Chrysso	91.02	Chrysso	Chrysso scintillans
	32	0	2	Ariamnes	F	54.15	Ariamnes	31.27	Ariamnes	Ariamnes cylindrogaster
	33	0	0	Leucauge	F	33.89	Tetragnatha	65.77	Araneoidea	Leucauge celebesiana
	34	2	2	Chrysso	F	82.23	Chrysso	92.82	Chrysso	Chrysso venusta
	35	2	2	Argiope	F	91.85	Argiope	92.14	Argiope	Argiope aemula
	36	2	2	Philodromus	F	75.34	Hersilia	77.34	Hersilia	Hersilia asiatica
	37	2	2	Tetragnatha	F	80.71	Tetragnatha	80.37	Tetragnatha	Tetragnatha
	38	0	2	Epeus	F	46.88	Epeus	45.92	Epeus	Epeus bicuspidatus
	39	2	1	Heteropoda	F	91.46	Heteropoda	92.43	Sparassidae	Heteropoda
	40	0	0	Bijoaraneus	F	61.23	Bijoaraneus	73.14	Bijoaraneus	Araneus mitificus
	41	0	2	Mendoza	M	48.32	Mendoza	82.52	Padilothorax	Padillothorax semiostrinus
	42	0	0	Heteropoda	F	91.8	Heteropoda	93.9	nan	Bhutaniella latissima	not within SpiderID dataset genera list
	43	0	0	Theridion	F	43.87	Araniella	48.46	nan	Lysiteles	not within SpiderID dataset genera list
	44	0	1	Heteropoda	F	55.71	Heteropoda	51.12	Thomisidae	Borboropactus	not within SpiderID dataset genera list
	45	0	0	Chrysilla	M	83.3	Chrysilla	95.41	Chrysilla	Zebraplatys bulbus	not within SpiderID dataset genera list
	46	0	0	Anelosimus	F	29.64	Anelosimus	84.33	nan	Linyphiidae	not within SpiderID dataset genera list
	47	0	0	Dictyna	F	28.71	Clubiona	41.11	nan	Phoroncidia	not within SpiderID dataset genera list
	48	0	0	Spermophora	F	84.81	Spermophora	66.65	nan	Belisana junkoae	not within SpiderID dataset genera list
	49	0	0	Araneus	F	17.99	Tylorida	22.73	nan	Macrothele	not within SpiderID dataset genera list
	50	0	0	Evarcha	F	28.83	Epeus	40.77	nan	Spartateus	not within SpiderID dataset genera list
	51	0	1	Carrhotus	F	49.12	Carrhotus	79.44	Salticidae	Yaginumaella lobata	not within SpiderID dataset genera list

## Sheet: Table S1B
	_NG	SISS evaluation of NoGender model
	_M	SISS evaluation of WithGender model, for Male Spider
	_F	SISS evaluation of WithGender model, for Female Spider
Index	Family	Genus	Dataset Metadata								Prediction Accuracy												Species
			Scraped Image Count	Labeled Image Count	Balanced Labeled Image Count	Male Count	Female Count	Male Percentage	True Label	Species Count	v5_NG	v5_M	v5_F	v6_NG	v6_M	v6_F	v7_NG	v7_M	v7_F	v8_NG	v8_M	v8_F
0	Agelenidae	Agelena	176	147	600	28	119	19	0,1	2	30	90	75	100	10	58.33	76.67	25	66.67	11.11	0	12.5	Agelena limbata; Agelena tungchis
1	Agelenidae	Allagelena	195	164	600	38	126	23	2,3	1	59.38	78.57	94.44	91.67	43.75	50	83.33	66.67	77.78	50	25	25	Allagelena opulenta
2	Ctenidae	Anahita	126	119	600	20	99	17	4,5	2	72.73	0	86.36	80.77	50	69.23	80.77	100	91.67	33.33	0	50	Anahita fauna; Anahita maolan
3	Theridiidae	Anelosimus	194	167	600	28	139	17	6,7	3	82.35	100	76.92	88.89	50	73.08	91.18	12.5	91.67	62.5	12.5	80	Anelosimus chonganicus; Anelosimus crassipes; Anelosimus taiwanicus
4	Anyphaenidae	Anyphaena	193	174	600	31	143	18	8,9	3	73.33	87.5	92.86	100	25	50	94.44	62.5	76.92	60.71	0	33.33	Anyphaena pugil; Anyphaena taiwanensis; Anyphaena wuyi
5	Araneidae	Arachnura	108	99	600	0	99	0	10,11	3	90	0	90.91	83.33	0	95.45	100	0	100	20	0	22.22	Arachnura logio; Arachnura melanura; Arachnura spinosa
6	Araneidae	Araneus	220	201	600	6	195	2	12,13	4	71.15	0	79.63	75	0	80.36	82.69	0	90.74	36	0	38.64	Araneus seminiger; Araneus viridiventris; Araneus ejusmodi; Araneus inustus
7	Araneidae	Araniella	193	183	600	7	176	4	14,15	1	75	50	94.44	100	0	83.33	94.44	50	97.22	23.33	0	20.83	Araniella yaginumai
8	Lycosidae	Arctosa	193	190	600	0	190	0	16,17	4	62.5	0	68.42	86.11	0	70	75	0	80.56	42.31	0	34.62	Arctosa indica; Arctosa labiata; Arctosa laminata; Arctosa truncata
9	Araneidae	Argiope	552	490	600	66	424	13	18,19	7	96.03	100	87.1	92.03	80	86.51	97.06	75	88.71	46.21	33.33	44.92	Argiope aemula; Argiope aetheroides; Argiope amoena; Argiope chloreis; Argiope minuta; Argiope ocula; Argiope perforata
10	Theridiidae	Argyrodes	328	185	600	53	146	26	20,21	6	88.64	68.18	81.82	93.18	42.86	76.92	90.91	50	86.36	38.64	20	38.89	Argyrodes bonadea; Argyrodes fissifrons; Argyrodes flavescens; Argyrodes kumadai; Argyrodes lanyuensis; Argyrodes miniaceus
11	Theridiidae	Ariamnes	195	187	600	0	187	0	22,23	1	92	0	92.86	100	0	98.21	93.1	0	98.21	48.21	0	51.85	Ariamnes cylindrogaster
12	Salticidae	Asemonea	172	162	600	106	56	65	24,25	1	91.18	96.15	100	100	100	100	100	96.15	100	40.62	38.46	33.33	Asemonea tanikawai
13	Atypidae	Atypus	194	124	600	67	57	54	26,27	2	68.18	92.86	100	96.67	66.67	80	96.15	85.71	100	55	50	62.5	Atypus formosensis; Atypus karschi
14	Salticidae	Bavia	156	141	600	88	53	62	28,29	1	53.33	88.89	100	93.33	70	41.67	85.71	94.44	87.5	29.17	31.25	50	Bavia aericeps
15	Araneidae	Bijoaraneus	207	161	600	26	136	16	30,31	1	75	80	95.83	100	16.67	57.14	73.53	20	90.91	26.67	0	27.78	Bijoaraneus mitificus
16	Halonoproctidae	Bothriocyrtum	197	87	600	68	19	78	32,33	1	68.75	87.5	100	100	100	0	100	87.5	100	12.5	21.43	0	Bothriocyrtum tractabile
17	Salticidae	Carrhotus	523	484	600	203	292	41	34,35	4	69.23	100	96.15	96	73.81	62.5	82.29	90.91	77.08	25.61	23.33	28.95	Carrhotus sannio; Carrhotus tristis; Carrhotus viduus; Carrhotus xanthogramma
18	Cheiracanthiidae	Cheiracanthium	193	129	600	82	47	64	36,37	9	76.92	100	87.5	92.86	75	6.25	100	91.67	31.25	33.33	16.67	12.5	Cheiracanthium antungense; Cheiracanthium eutittha; Cheiracanthium falcatum; Cheiracanthium filiapophysium; Cheiracanthium insulanum; Cheiracanthium lascivum; Cheiracanthium mordax; Cheiracanthium taiwanicum; Cheiracanthium torsivum
19	Theridiidae	Chikunia	220	165	600	43	132	24	38,39	1	82.35	100	80	100	77.78	100	86.11	91.67	95	8.82	14.29	6.25	Chikunia nigra
20	Salticidae	Chrysilla	194	183	600	100	83	55	40,41	1	94.44	96.15	100	100	76.92	100	88.89	92.31	90	26.47	37.5	25	Chrysilla lauta
21	Theridiidae	Chrysso	183	86	600	13	77	14	42,43	4	86.36	0	86.36	100	0	87.5	95.45	0	100	35	0	38.89	Chrysso trimaculata; Chrysso foliata; Chrysso argyrodiformis; Chrysso octomaculata
22	Clubionidae	Clubiona	194	166	600	41	125	25	44,45	18	75	75	96.15	100	30	59.09	91.18	87.5	53.85	26.67	0	57.14	Clubiona asrevida; Clubiona brevispina; Clubona corrugata; Clubiona deletrix; Clubiona expansa; Clubiona femorocalcarata; Clubiona insulana; Clubiona japonica; Clubiona japonicola; Clubiona jucunda; Clubiona kayashimai; Clubiona kurilensis; Clubiona kurosawai; Clubiona moralis; Clubiona tanikawai; Clubiona viridula; Clubiona yaginumai; Clubiona yangmingensis
23	Corinnidae	Corinnomma	177	79	600	8	72	10	46,47	1	83.33	25	83.33	80	0	68.75	100	0	85.71	27.78	0	50	Corinnomma severum
24	Salticidae	Cosmophasis	192	86	600	21	65	24	48,49	1	66.67	87.5	80	100	12.5	33.33	88.89	10	66.67	0	0	0	Cosmophasis lami
25	Pholcidae	Crossopriza	190	93	600	6	87	6	50,51	1	45	50	100	100	0	61.11	86.36	0	72.22	33.33	0	44.44	Crossopriza lyoni
26	Ctenidae	Ctenus	194	183	600	0	183	0	52,53	1	67.65	0	77.78	80	0	61.36	73.68	0	85.29	33.33	0	26.92	Ctenus yaeyamansis
27	Araneidae	Cyclosa	257	155	600	11	145	7	54,55	18	76.19	0	63.04	74.14	0	83.33	82.14	0	88.89	7.89	0	9.38	Cyclosa argentata; Cyclosa argenteoalba; Cyclosa confusa; Cyclosa conica; Cyclosa formosana; Cyclosa ginnaga; Cyclosa japonica; Cyclosa koi; Cyclosa laticauda; Cyclosa monticola; Cyclosa mulmeinensis; Cyclosa octotuberculata; Cyclosa omonaga; Cyclosa quinqueguttata; Cyclosa sedeculata; Cyclosa shinoharai; Cyclosa tricauda; Cyclosa valllata
28	Araneidae	Cyrtarachne	585	270	600	2	268	0	56,57	6	96.67	0	93.55	96.67	0	100	100	0	100	28.33	0	27.42	Cyrtarachne akirai; Cyrtarachne bufo; Cyrtarachne inaequalis; Cyrtarachne nagasakiensis; Cyrtarachne schmidi; Cyrtarachne yunoharuensis
29	Araneidae	Cyrtophora	613	276	600	20	256	7	58,59	6	80.56	0	92.65	84.15	0	86.49	94.44	0	98.65	35.29	0	37.04	Cyrtophora bicauda; Cyrtophora cylindroides; Cyrtophora exanthematica; Cyrtophora ikomosanensis; Cyrtophora moluccensis; Cyrtophora unicolor
30	Thomisidae	Diaea	193	183	600	12	171	7	60,61	1	89.58	0	100	87.1	0	80.77	96.43	50	86.54	14	0	15.91	Diaea subdola
31	Scytodidae	Dictis	140	135	600	34	101	25	62,63	1	79.17	83.33	81.25	87.5	66.67	71.43	96.15	80	87.5	54.17	90	30	Dictis striatipes
32	Dictynidae	Dictyna	141	137	600	37	100	27	64,65	2	70	80	100	96.43	0	62.5	80.77	30	85.71	41.67	0	33.33	Dictyna felis; Dictyna foliicola
33	Pisauridae	Dolomedes	880	427	600	88	340	20	66,67	3	82.95	91.67	94.12	97.83	57.69	72.37	94.57	41.67	92.65	50	36.36	32.69	Dolomedes raptor; Dolomedes mizhoanus; Dolomedes sulfureus
34	Thomisidae	Ebrechtella	157	66	600	29	37	43	68,69	3	27.78	60	50	55.56	30	20	33.33	40	25	7.14	12.5	0	Ebrechtella forcipata; Ebrechtella pseudovatia; Ebrechtella tricuspidatus
35	Theridiidae	Enoplognatha	193	162	600	12	150	7	70,71	1	70.83	0	82.35	97.06	0	50	90.62	0	81.25	18.18	0	20	Enoplognatha caricis
36	Salticidae	Epeus	468	233	600	111	124	47	72,73	3	93.48	100	100	100	100	87.5	100	100	95	21.74	12.5	23.68	Epeus bicuspidatus; Epeus glorius; Epeus guangxi
37	Theridiidae	Episinus	194	183	600	25	158	14	74,75	5	71.05	75	91.18	100	50	57.89	97.37	100	94.12	43.33	0	31.25	Episinus affinis; Episinus makiharai; Episinus nubilus; Episinus punctisparsus; Episinus yoshidai
38	Salticidae	Epocilla	194	189	600	128	61	68	76,77	1	86.11	96.15	100	100	96.15	100	97.22	100	83.33	38.89	53.85	20	Epocilla calcarata
39	Araneidae	Eriovixia	536	362	600	22	340	6	78,79	1	85.9	100	100	96.51	50	78.75	97.5	37.5	90.54	20	0	17.14	Eriovixia excelsa
40	Euagridae	Euagrus	154	137	600	46	91	34	80,81	1	62.5	0	92.86	92.86	0	75	96.15	0	84.62	36.36	0	28.57	Euagrus formosanus
41	Salticidae	Evarcha	192	185	600	46	139	25	82,83	4	44.12	76.92	100	95	20	50	68.42	20.83	50	23.33	0	33.33	Evarcha bulbosa; Evarcha fasciata; Evarcha flavocincta; Evarcha hirticeps
42	Araneidae	Gasteracantha	519	253	600	0	253	0	84,85	4	88.57	0	87.88	94.44	0	94.44	97.14	0	95.83	4.55	0	4.55	Gasteracantha cancriformis; Gasteracantha fornicata; Gasteracantha kuhli; Gasteracantha sauteri
43	Araneidae	Gea	194	178	600	70	108	39	86,87	1	90	100	95.45	100	91.67	92.86	94.64	100	90.91	26.92	12.5	30	Gea spinipes
44	Oxyopidae	Hamadruas	158	156	600	17	139	11	88,89	1	86.84	57.14	100	97.22	22.22	92.31	100	50	100	38.89	16.67	40	Hamadruas hieroglyphica
45	Salticidae	Harmochirus	193	173	600	108	65	62	90,91	1	71.43	87.5	80	100	54.17	31.25	100	92.86	16.67	38.46	25	8.33	Harmochirus brachiatus
46	Salticidae	Hasarius	192	174	600	111	63	64	92,93	1	86.11	96.15	100	100	69.23	80	86.11	80.77	80	14.71	20	12.5	Hasarius adansoni
47	Araneidae	Herennia	156	164	600	21	143	13	94,95	1	87.5	100	92.86	86.67	0	91.07	94.64	0	100	60.71	0	63.46	Herennia multipuncta
48	Hersiliidae	Hersilia	135	122	600	32	90	26	96,97	3	85.29	0	68.18	75	0	82.35	92.86	0	87.88	38.24	0	45.16	H. asiatica; H. striata, H. taiwanensis; H. montana
49	Sparassidae	Heteropoda	140	112	600	28	84	25	98,99	2	89.13	0	61.54	66.07	20	68.18	83.33	0	76.19	75	33.33	73.53	Heteropoda venatoria; Heteropoda pingtungensis
50	Lycosidae	Hippasa	130	116	600	2	114	2	100,101	2	89.47	0	92.11	92.5	0	100	100	0	100	31.58	0	28.95	Hippasa agelenoides; Hippasa holmerae
51	Pisauridae	Hygropoda	194	190	600	18	172	9	102,103	1	82	12.5	87.5	100	0	76	91.07	0	89.58	58.33	0	50	Hygropoda higenaga
52	Araneidae	Hypsosinga	192	189	600	24	165	13	104,105	2	80.56	100	94.44	100	0	86.11	94.74	100	85.29	40.62	0	33.33	Hypsosinga pygmaea; Hypsosinga sanguinea
53	Theridiidae	Latrodectus	249	91	600	4	87	4	106,107	3	50	0	100	100	0	77.78	94.44	0	83.33	0	0	0	Latrodectus elegans; Latrodectus geometricus; Latrodectus hasselti
54	Tetragnathidae	Leucauge	357	345	600	10	338	2	108,109	13	88.81	0	87.9	87.14	0	90.3	97.79	100	97.01	31.15	0	28.33	Leucauge argentina; Leucauge blanda; Leucauge celebesiana; Leucauge crucinota; Leucauge decorata; Leucauge liui; Leucauge magnifica; Leucauge subblanda; Leucauge subgemmea; Leucauge taiwanica; Leucauge tessellata; Leucauge venusta; Leucauge wulingensis
55	Sicariidae	Loxosceles	193	184	600	56	128	30	110,111	1	67.65	100	92.86	92.5	58.33	50	89.47	100	53.57	37.5	37.5	28.57	Loxosceles rufescens
56	Lycosidae	Lycosa	191	178	600	5	173	3	112,113	4	73.53	0	88.24	100	0	55.26	84.21	0	89.29	53.85	0	55.56	Lycosa boninensis; Lycosa coelestis; Lycosa formosana; Lycosa phipsoni
57	Salticidae	Marpissa	193	188	600	40	148	21	114,115	1	68.75	100	100	100	0	54.17	72.22	33.33	72.73	13.33	0	5.56	Marpissa pulla
58	Salticidae	Mendoza	177	183	600	19	164	10	116,117	1	90	92.86	100	100	75	90.91	88.24	83.33	90.91	33.33	33.33	25	Mendoza elongata
59	Salticidae	Menemerus	106	96	600	24	74	24	118,119	3	54.55	100	93.75	100	0	65	95.45	50	90	20	0	8.33	Menemerus bivittatus; Menemerus brachygnathus; Menemerus fulvus
60	Mimetidae	Mimetus	167	158	600	42	116	27	120,121	1	100	100	88.46	100	100	89.29	100	100	92.31	75	100	70.83	Mimentus ryukyus
61	Thomisidae	Monaeses	102	95	600	15	80	16	122,123	1	87.5	0	88.89	100	0	75	85	0	90	60	0	55	Monaeses aciculus
62	Salticidae	Myrmarachne	192	169	600	116	53	69	124,125	2	33.33	21.43	16.67	42.5	37.5	12.5	42.5	30	20	3.33	10	0	Lycosa formosana; Lycosa phipsoni
63	Araneidae	Neoscona	238	226	600	31	195	13	126,127	3	80.77	100	52.94	60.23	64.29	55.13	89.02	91.67	83.33	25.68	50	20.45	Neoscona scylloides; Neoscona punctigera; Neoscona melloteei
64	Araneidae	Nephila	123	88	600	12	88	12	128,129	2	70	0	66.67	64	0	84.78	80	0	95	30.95	0	36.84	Nephila pilipes;
65	Linyphiidae	Neriene	193	170	600	36	134	21	130,131	2	73.53	100	93.75	82.5	50	77.78	88.89	0	90.62	20.59	0	10.71	Neriene albolimbata;
66	Theridiidae	Nesticodes	184	178	600	21	157	12	132,133	1	88.24	0	94.12	97.22	0	68.42	86.11	0	75	21.88	0	23.33	Nesticodes rufipes
67	Theridiidae	Nihonhimea	190	167	600	6	161	4	134,135	1	73.08	0	96.88	86.84	0	75	79.41	0	76.67	0	0	0	Nihonhimea japonica
68	Titanoecidae	Nurscia	134	125	600	50	75	40	136,137	1	75	100	66.67	83.33	50	50	79.17	66.67	75	44.44	50	25	Nurscia albofasciata
69	Salticidae	Ocrisiona	194	192	600	24	168	12	138,139	1	90.62	100	91.67	100	0	90	90	0	86.11	26.47	0	25	Ocrisiona frenata
70	Sparassidae	Olios	193	178	600	50	128	28	140,141	1	70.59	75	96.15	97.22	50	50	100	87.5	89.29	29.41	33.33	14.29	Olios scalptor
71	Araneidae	Ordgarius	127	86	600	1	85	1	142,143	1	57.14	0	87.5	100	0	100	87.5	0	81.25	21.43	0	0	Ordgarius hobsoni
72	Oxyopidae	Oxyopes	370	344	600	68	276	19	144,145	5	91.84	0	80.23	87.74	0	83.33	95.28	0	87.5	28.26	0	30	Oxyopes fujianicus; Oxyopes macilentus; Oxyopes sertatus; Oxyopes striagatus; Oxyopes sushilae
73	Thomisidae	Oxytate	194	183	600	10	173	5	146,147	1	80.56	0	90.48	93.18	0	77.5	97.62	0	92.86	22.22	0	26.67	Oxytate striatipes
74	Salticidae	Pancorius	194	185	600	14	171	8	148,149	3	91.18	50	97.22	100	0	76.32	94.12	0	94.12	27.78	0	30	Pancorius magnus; Pancorius taiwanensis;
75	Theridiidae	Parasteatoda	132	122	600	27	95	22	150,151	11	58.33	83.33	95	90.62	0	77.27	63.33	0	85	22.73	0	14.29	Parasteatoda angulithorax; Parasteatoda ferrumequina; Parasteatoda kentingensis; Parasteatoda kompirensis; Parasteatoda lanyuensis; Parasteatoda lunate; Parasteatoda quadrimaculata; Parasteatoda ryukyu; Parasteatoda taiwanica; Parasteatoda tepidariorum; Parasteatoda transipora
76	Araneidae	Parawixia	90	73	600	3	71	4	152,153	1	45	0	40	58.33	0	70	80	0	90	5.56	0	20	Parawixia dehaani
77	Lycosidae	Pardosa	194	186	600	18	168	10	154,155	1	75	100	80.65	85.53	0	52.56	82.35	50	73.33	33.33	0	36	Pardosa jambaruensis
78	Oxyopidae	Peucetia	192	172	600	2	170	1	156,157	2	85.19	0	82.69	100	0	78.57	98.21	0	94.23	57.14	0	56.25	Peucetia formosensis;
79	Philodromidae	Philodromus	194	187	600	39	148	21	158,159	1	43.75	91.67	91.67	94.74	21.43	61.54	86.84	33.33	84.62	44.12	33.33	33.33	Philodromus subaureolus Bösenberg
80	Uloboridae	Philoponella	170	150	600	6	144	4	160,161	2	80.77	0	86.67	93.75	0	60.71	75	0	79.17	13.64	0	16.67	Philoponella prominens; Philoponella nigromaculata
81	Salticidae	Phintella	192	190	600	85	105	45	162,163	1	80	87.5	94.12	97.62	75	79.41	95	100	96.67	9.52	33.33	10	Phintella debilis
82	Salticidae	Phintelloides	98	85	600	35	50	41	164,165	1	78.57	0	8.33	55	100	22.22	83.33	100	42.86	64.29	0	25	Phintelloides versicolor
83	Theraphosidae	Phlogiellus	113	107	600	0	107	0	166,167	1	60	0	86.36	100	0	100	90.91	0	90.91	70	0	63.64	Phlogiellus watasei
84	Pholcidae	Pholcus	186	180	600	1	179	1	168,169	5	71.88	0	81.58	92.11	0	67.5	86.11	0	91.67	65.62	0	73.33	Pholcus crypticolens; Pholcus fragillimus; Pholcus inermis; Pholcus phalangioides; Pholcus spilis
85	Thomisidae	Phrynarachne	101	96	600	0	96	0	170,171	2	63.64	0	83.33	81.82	0	86.36	90.91	0	86.36	31.25	0	25	Phrynarachne ceylonica; Phrynarachne mammillata
86	Theridiidae	Phycosoma	163	150	600	38	112	25	172,173	1	93.33	83.33	91.67	93.33	50	79.17	96.67	83.33	91.67	42.86	16.67	35	Phycosoma nigromaculatum
87	Pisauridae	Pisaura	157	152	600	0	152	0	174,175	1	71.43	0	90	93.75	0	72.22	84.38	0	93.33	50	0	50	Pisaura bicornis
88	Theridiidae	Platnickina	194	180	600	14	166	8	176,177	2	70	0	94.44	100	0	76.47	86.11	0	82.35	53.33	0	64.29	Platnickina maculata; Platnickina mneon
89	Araneidae	Plebs	165	161	600	2	159	1	178,179	3	79.41	0	100	100	0	88.24	94.12	0	100	32.35	0	36.67	Plebs astridae; Plebs plumiopedellus; Plebs yanbaruensis
90	Salticidae	Plexippus	290	249	600	124	127	49	180,181	3	73.08	94.12	80	94.23	80	77.78	92.59	94.12	90	16.67	15	25	Plexippus incognitus; Plexippus paykulli; Plexippus petersi
91	Araneidae	Poltys	167	153	600	0	155	0	182,183	3	71.05	0	95	95.24	0	68.18	84.21	0	80	17.5	0	23.33	Poltys idea; Poltys illepidus; Poltys nigrinus
92	Salticidae	Portia	194	186	600	2	184	1	184,185	2	79.41	0	94.74	100	0	88.89	89.47	0	88.89	38.24	0	38.24	Portia fimbriata; Portia taiwanica
93	Salticidae	Ptocasius	92	81	600	12	69	14	186,187	1	78.57	0	57.14	83.33	0	84.38	93.75	0	83.33	10	0	12.5	Ptocasius strupifer
94	Salticidae	Rhene	50	47	600	33	14	70	188,189	2	30	100	11.11	34.62	0	30	45.45	0	40	10	0	12.5	Rhene atrata; Rhene rubrigera
95	Theridiidae	Rhomphaea	194	183	600	10	173	5	190,191	3	67.86	0	87.5	92.5	0	73.53	94.12	0	87.5	40	0	45.83	Rhomphaea labiata; Rhomphaea labiatus; Rhomphaea sagana
96	Thomisidae	Runcinia	194	189	600	9	180	5	192,193	2	67.65	0	94.74	100	0	63.16	90	0	81.58	33.33	0	38.46	Runcinia affinis; Runcinia insecta
97	Scytodidae	Scytodes	192	176	600	64	112	36	194,195	2	84.38	100	92.31	100	75	53.33	91.67	100	65.38	40.62	50	20	Scytodes thoracica; Scytodes pallida
98	Salticidae	Siler	121	118	600	10	113	8	196,197	1	72.73	0	95.45	100	0	70.83	96.43	0	95.45	79.17	0	83.33	Siler cupreus
99	Pholcidae	Smeringopus	194	184	600	1	183	1	198,199	1	64.81	0	82.76	92.42	0	91.94	91.38	0	94.83	75.86	0	72.22	Smeringopus pallidus
100	Pholcidae	Spermophora	112	104	600	24	80	23	200,201	1	81.82	100	87.5	90.91	16.67	81.25	95.45	0	88.89	45.45	100	60	Spermophora senoculata
101	Theridiidae	Steatoda	165	149	600	62	87	42	202,203	2	61.54	70	94.44	86.67	50	45.45	89.29	100	61.11	11.54	37.5	0	Steatoda cingulata; Steatoda erigoniformis
102	Thomisidae	Synema	188	165	600	58	107	35	204,205	2	90.62	87.5	96.15	91.67	33.33	38.46	97.06	87.5	66.67	34.38	62.5	16.67	Synema nangoku; Synema zonatum
103	Salticidae	Telamonia	101	98	600	40	58	40	206,207	2	58.33	100	87.5	83.33	83.33	18.18	62.5	100	55.56	35	83.33	20	Telamonia festiva; Telamonia vlijmi
104	Tetragnathidae	Tetragnatha	193	175	600	51	124	29	208,209	15	46.88	60	10	35.71	16.67	10.71	47.83	16.67	45.83	13.64	0	0	Tetragnatha bituberculata; Tetragnatha caudicula; Tetragnatha ceylonica; Tetragnatha chauliodus; Tetragnatha esakii; Tetragnatha gracilis; Tetragnatha hiroshii; Tetragnatha javana; Tetragnatha lauta; Tetragnatha mandibulata; Tetragnatha maxillosa; Tetragnatha nepaeformis; Tetragnatha nitens; Tetragnatha praedonia; Tetragnatha squamata
105	Araneidae	Thelacantha	98	87	600	5	82	5	210,211	1	44.44	0	13.33	29.41	0	55	89.47	0	86.11	0	0	0	Thelacantha brevispina
106	Sparassidae	Thelcticopis	194	183	600	69	114	38	212,213	3	82.35	100	91.67	94.74	60	50	94.74	66.67	57.69	47.22	50	45	Thelcticopis dahanensis; Thelticopis severa; Thelcticopis unciformis
107	Theridiidae	Theridion	192	179	600	9	170	5	214,215	2	50	0	88.89	94.44	0	50	61.76	0	50	16.67	0	10	Theridion elegantissimum; Theridion xianfengense
108	Salticidae	Thiania	126	122	600	26	96	21	216,217	1	64.29	100	100	100	10	95	92.31	100	85	20	0	22.22	Thiania suboppressa
109	Thomisidae	Thomisus	93	88	600	7	81	7	218,219	3	73.08	0	87.5	80	0	70	92.86	0	78.57	36.36	0	29.17	Thomisus guangxicus; Thomisus labefactus; Thomisus okinawensis
110	Salticidae	Thyene	191	183	600	58	125	32	220,221	1	43.75	70	89.29	83.33	0	59.38	55.26	0	61.54	16.67	0	18.18	Thyene imperialis
111	Thomisidae	Tmarus	194	182	600	24	158	13	222,223	3	83.33	66.67	100	94.44	16.67	80	100	0	100	35.29	0	34.62	Tmarus lanyu; Tmarus longqicus; Tmarus taiwanus
112	Salticidae	Toxeus	120	113	600	88	25	77	224,225	2	72.73	90.91	0	88.46	92.31	0	95.83	91.67	0	22.73	30	0	Toxeus latithoracicus; Toxeus magna
113	Araneidae	Trichonephila	89	86	600	24	62	27	226,227	1	50	0	38.46	67.65	0	57.5	87.5	0	90.62	40	0	34.62	Trichonephila clavata
114	Lycosidae	Trochosa	194	187	600	24	163	13	228,229	3	61.11	50	93.75	94.74	0	33.33	69.44	0	76.67	30.77	0	20.83	Trochosa aquatica; Trochosa ruricoloides; Trochosa wuchangensis
115	Tetragnathidae	Tylorida	192	176	600	10	166	6	230,231	4	76.32	0	91.18	81.82	0	59.52	86.84	100	80.56	32.35	0	30	Tylorida mengla; Tylorida striata; Tylorida tianlin; Tylorida ventralis
116	Thelyphonidae	Typopeltis	157	148	600	0	148	0	232,233	1	75	0	83.33	100	0	82.14	92.86	0	90	60.71	0	67.86	Typopeltis crucifer
117	Uloboridae	Uloborus	193	175	600	0	175	0	234,235	3	52.94	0	94.12	100	0	67.65	90	0	70.59	16.67	0	20	Uloborus formosanus; Uloborus penicillatoides; Uloborus walckenaerius
118	Thomisidae	Xysticus	168	161	600	21	140	13	236,237	4	67.65	83.33	96.43	100	33.33	64.71	88.24	33.33	92.86	43.33	0	50	Xysticus chui; Xysticus croceus; Xysticus ephippiatus; Xysticus kurilensis
119	Uloboridae	Zosis	193	173	600	17	156	10	238,239	1	79.41	50	100	100	33.33	66.67	97.22	66.67	86.67	62.5	0	60	Zosis geniculata
